# Supplementary material for: Immune Cells Localize to Sites of Corneal Erosions in C57BL/6 Mice
Source: MDPI journal article supplement (doi:10.3390/biom13071059), 2023-06-29
Supplement: s1 [file s1]

## Supplementary Materials for

### **Immune cells localize to sites of corneal erosions in C57BL/6 mice**

Phuong M. Le<sup>1</sup>, Sonali Pal-Ghosh<sup>2</sup>, A. Sue Menko<sup>1</sup>, and Mary Ann Stepp<sup>2,3\*</sup>

This PDF file includes Supplemental Figures S1 to S4

Day 1 post corneal wounding

Leading edge

In front of the leading edge

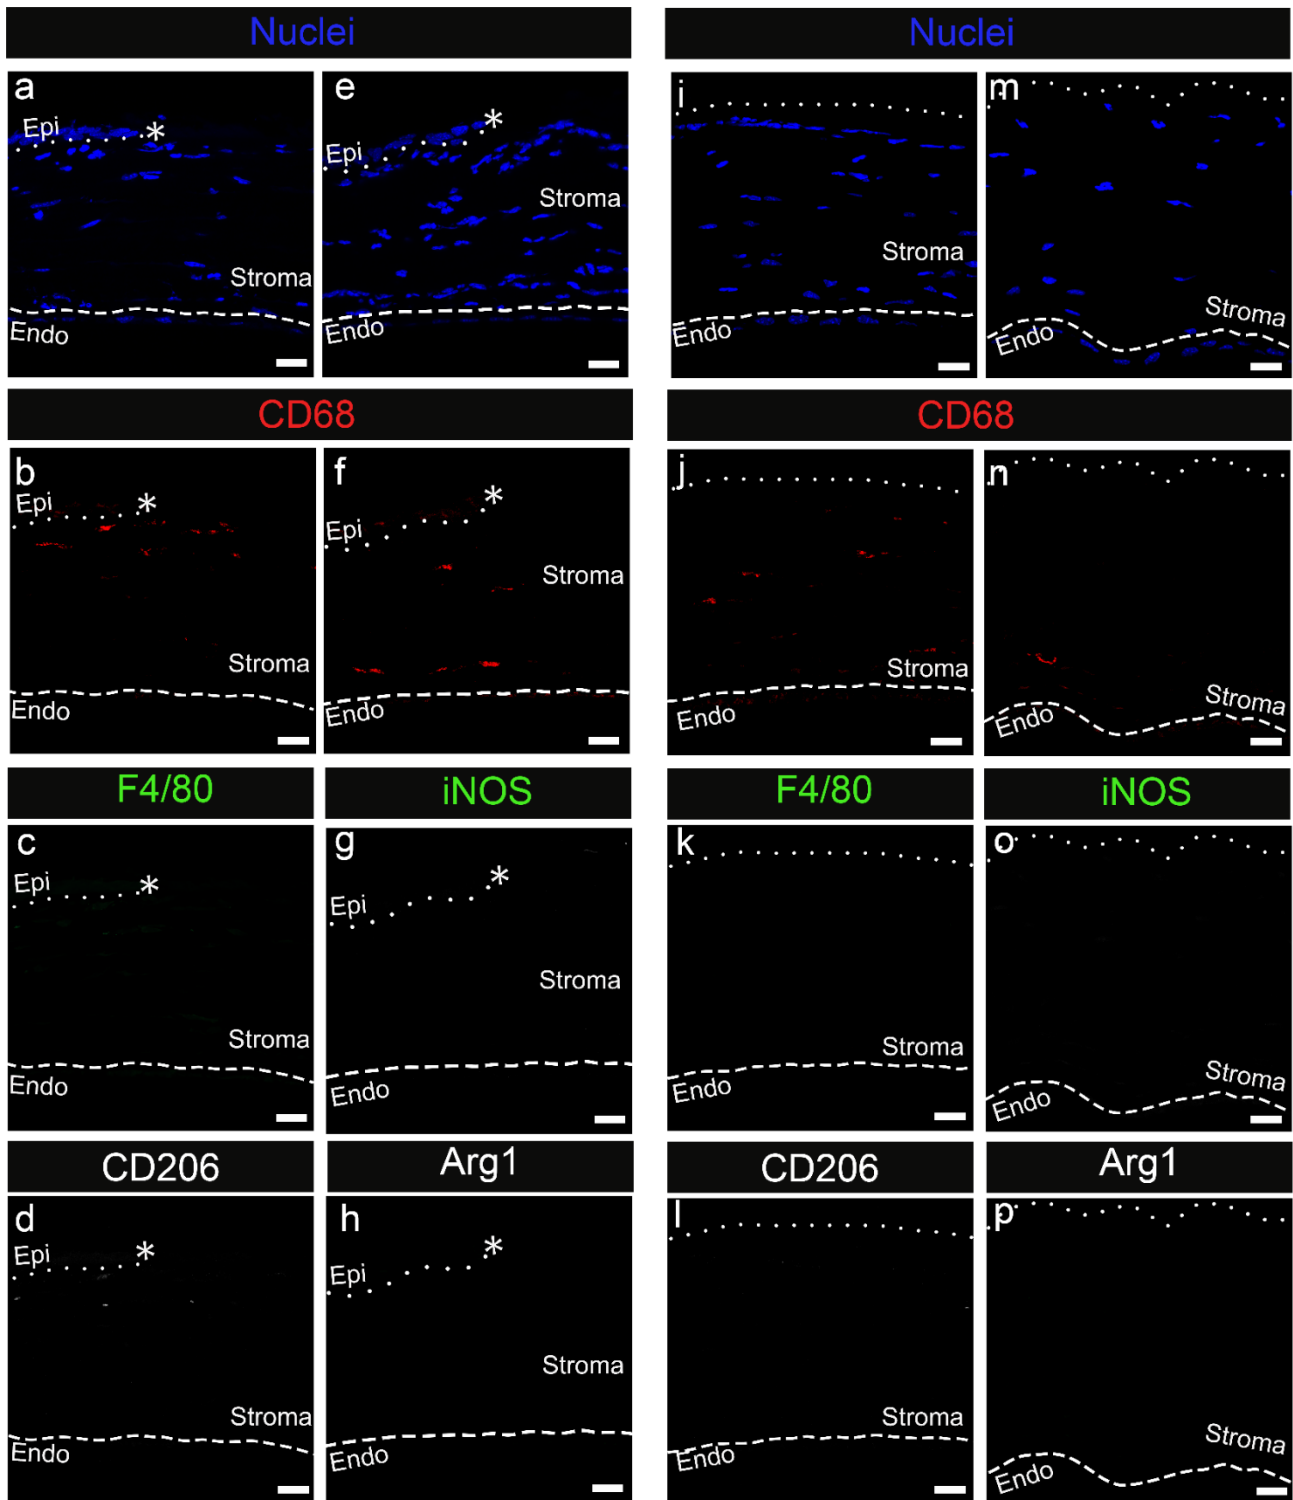

**Supplemental Figure S1.** CD68+ monocytes/macrophages infiltrating the central corneal stroma 1 day post debridement wounding neither express F4/80 nor exhibit M1/M2 polarization. Shown are representative images of CD68+ cells labeled with F4/80 (green), M1 marker iNOS (green), and M2 markers (CD206, Arg1) (white) in regions beneath the leading edge (a-h) and in front of the leading edge (i-p). Nuclei were stained with DAPI (blue). Asterisk, dotted line, and dashed line represent the wound edge, EpBM, Descemet's membrane, respectively. All images are 5µm projection. Mag bars: 20µm. Endo corneal endothelium, Epi corneal epithelium.

# In front of the leading edge

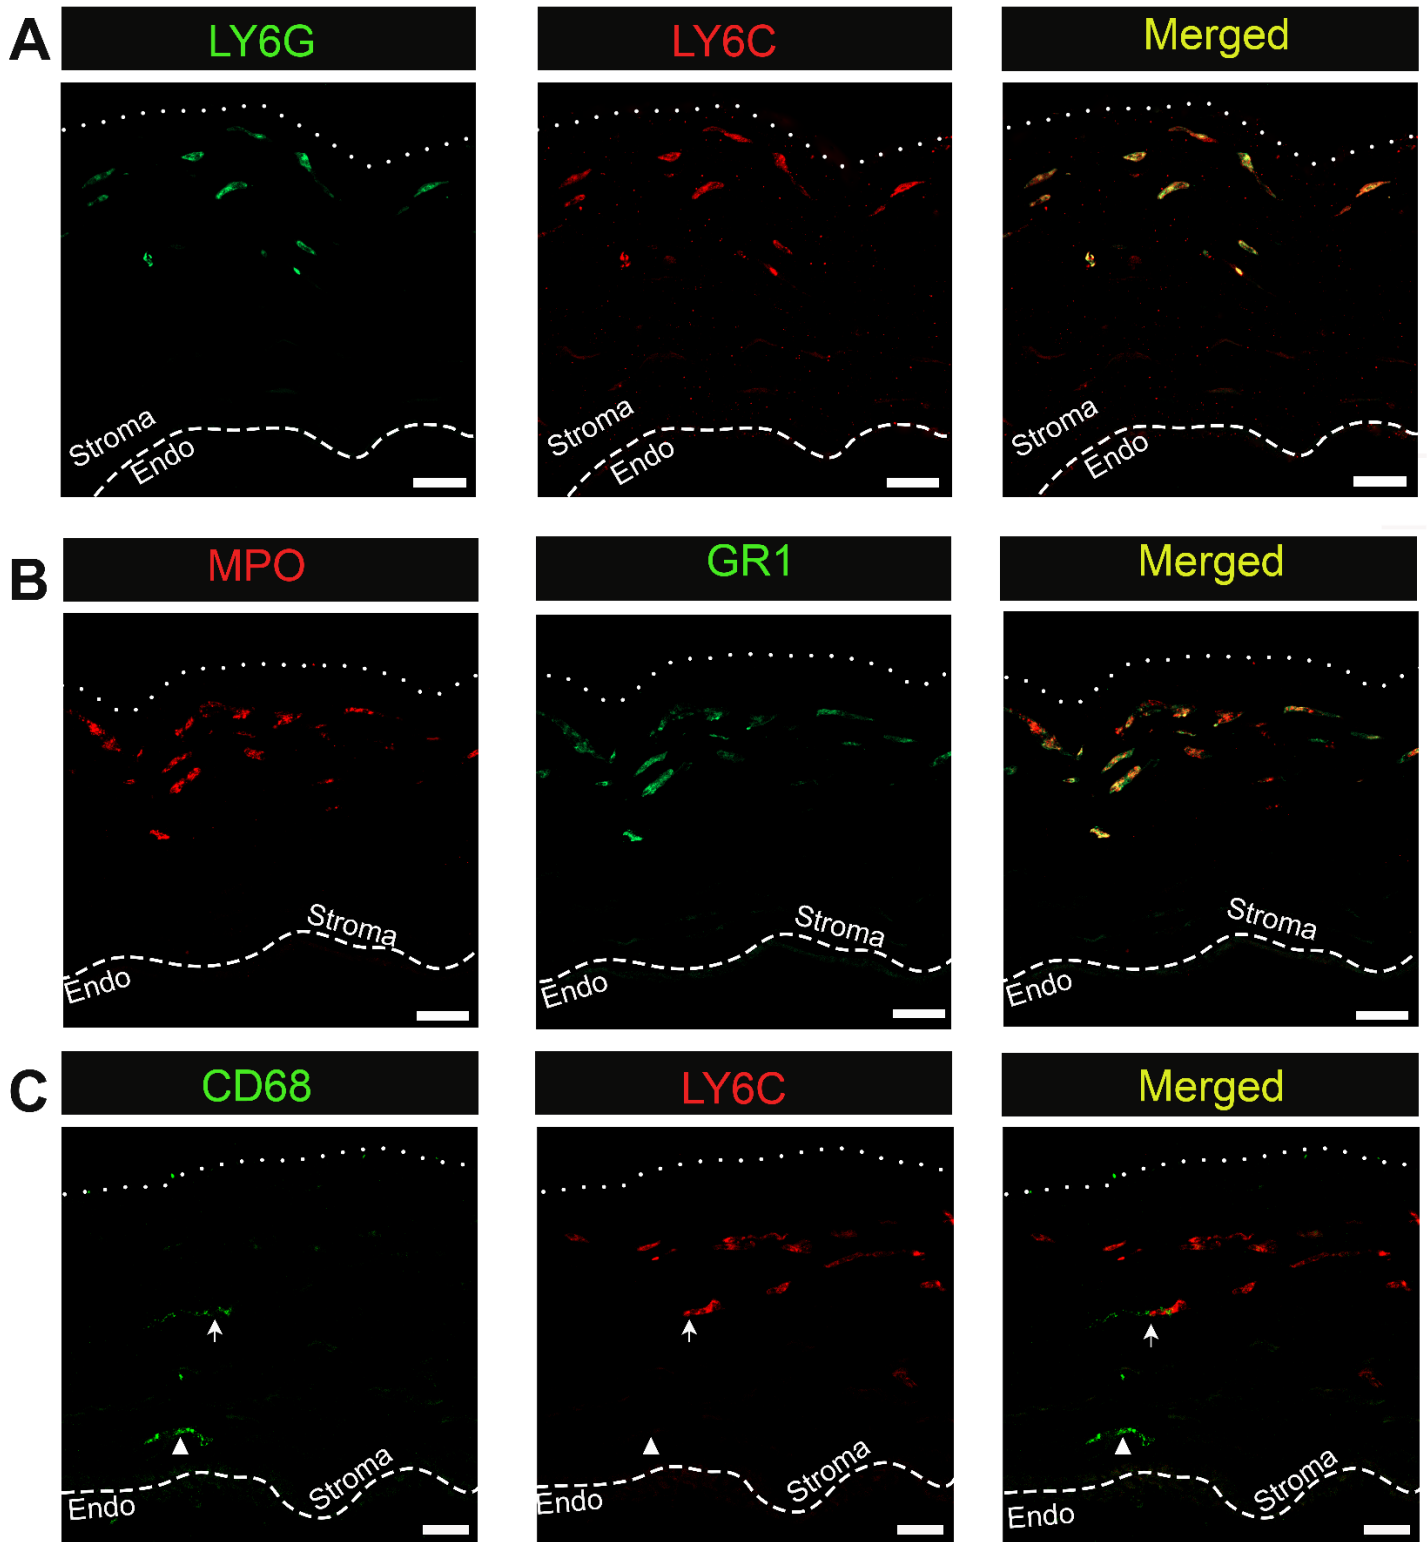

**Supplemental Figure S2.** The stroma beneath the open wound 1 day post debridement wounding is mainly populated by neutrophils and rarely by CD68+ monocytes/macrophages. Representative images of neutrophils co-expressing (A) LY6G (green) and LY6C (red) or (B) GR1 (green) and MPO (red). Please note that anti-GR1 (green) recognizes a shared epitope of LY6C and LY6G. (C) Representative images of CD68+ macrophages that can be either LY6C+ (arrow) or LY6C- (arrowhead). Dotted and dashed line represent the EpBM and Descemet's membrane, respectively. (A) 3 $\mu$ m projection, (B) 5 $\mu$ m projection. Mag bars: 20 $\mu$ m. Endo corneal endothelium.

# Day 1 post corneal wounding

Leading edge

In front of the leading edge

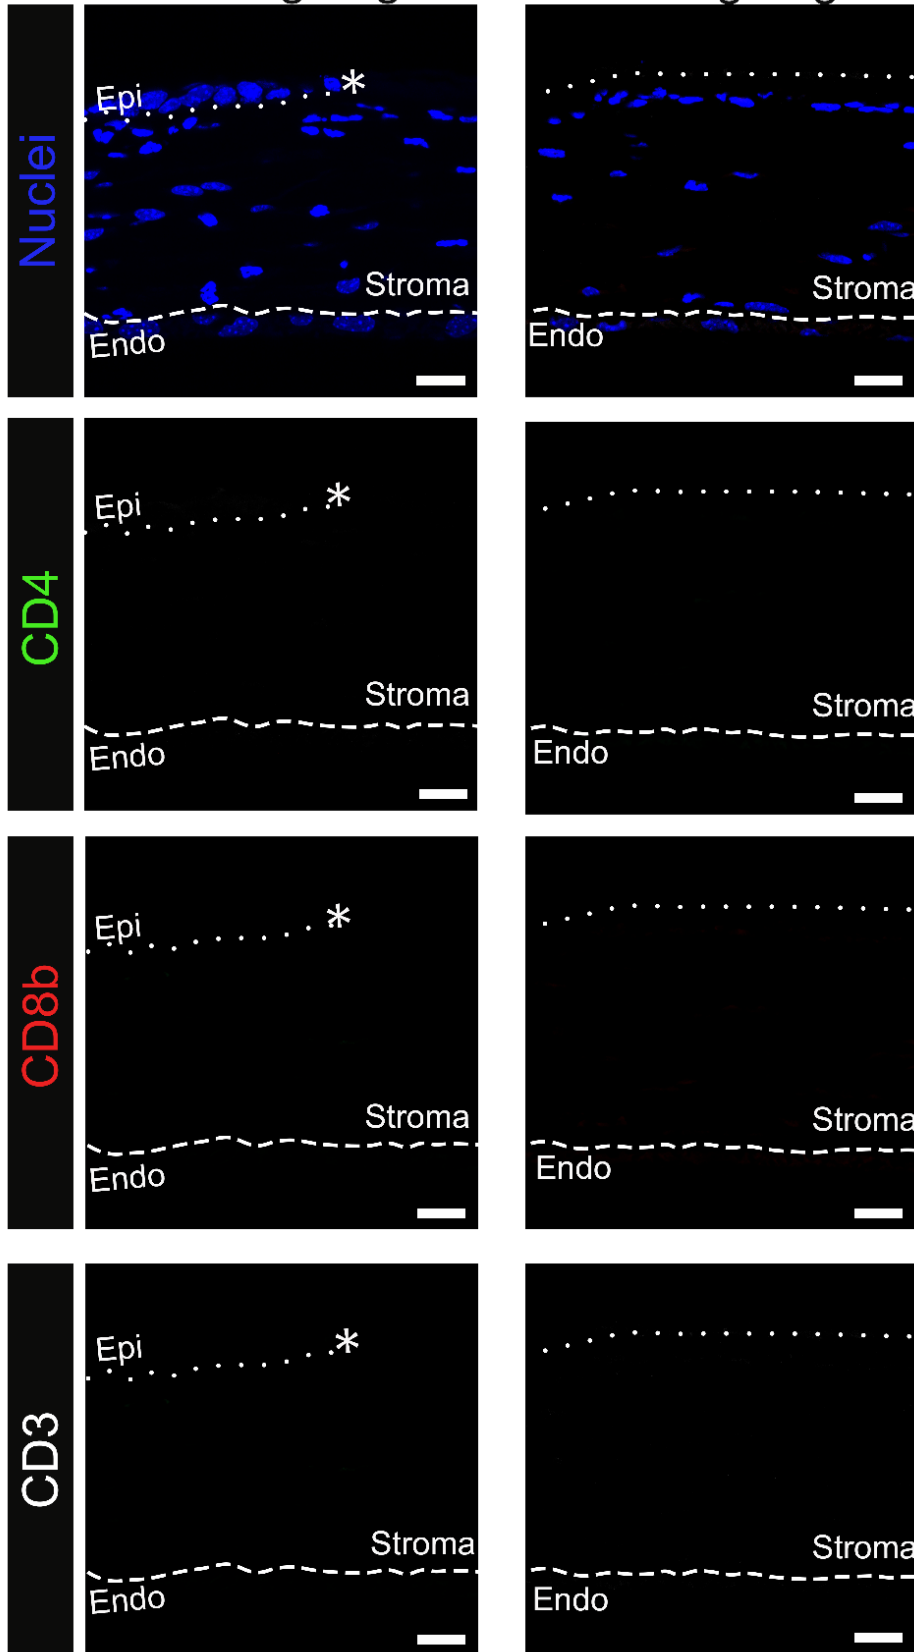

## Supplemental Figure S3.

No T cells are detected in the central corneal stroma 1 day post debridement wounding. Representative images of the stromal regions beneath the leading edge (left column) and in front of the leading edge (right column) co-labeled with T cell markers (CD3, CD4, CD8  $\beta$  chain). Nuclei were stained with DAPI (blue). Asterisk, dotted line, and dashed line represent the wound edge, EpBM, Descemet's membrane, respectively. All images are 5  $\mu$ m projection. Mag bars: 20  $\mu$ m. Endo corneal endothelium, Epi corneal epithelium.

5  $\mu$ m projection

# Day 7 post corneal wounding

Peripheral cornea

Central cornea

F-actin

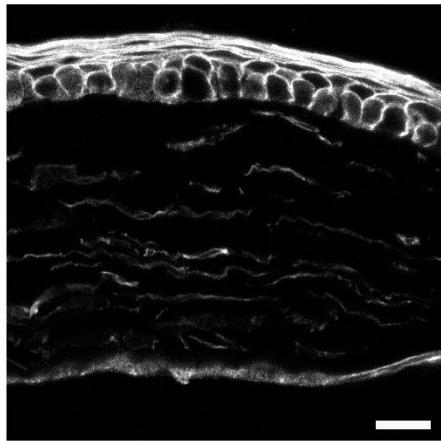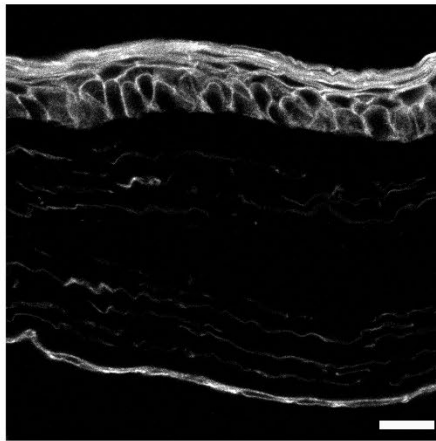

$\beta 2$  integrin

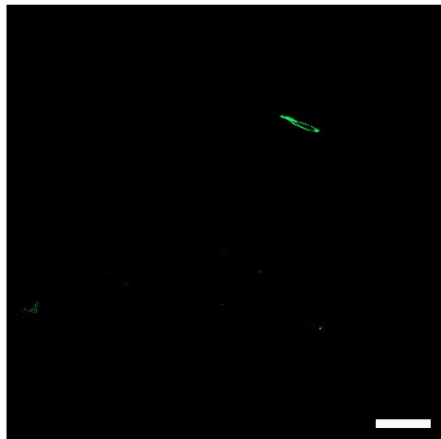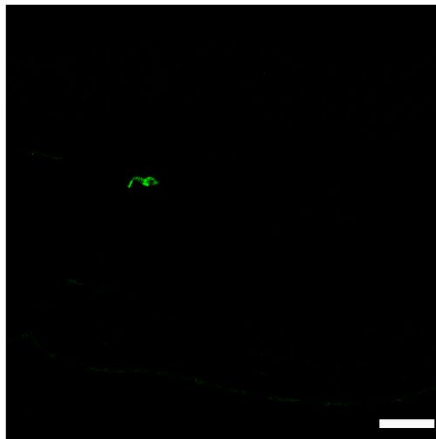

$\alpha 6$  integrin

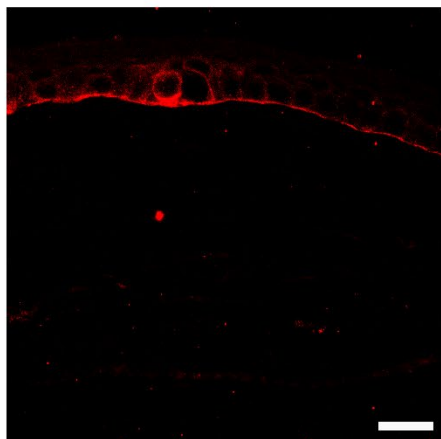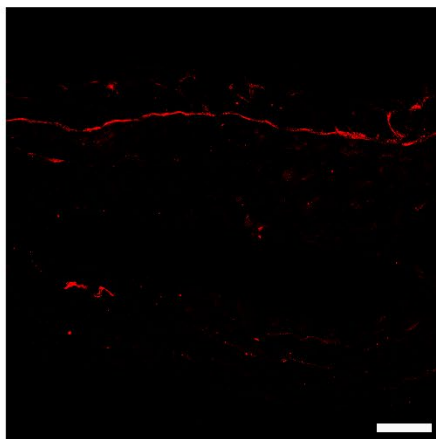

Merged

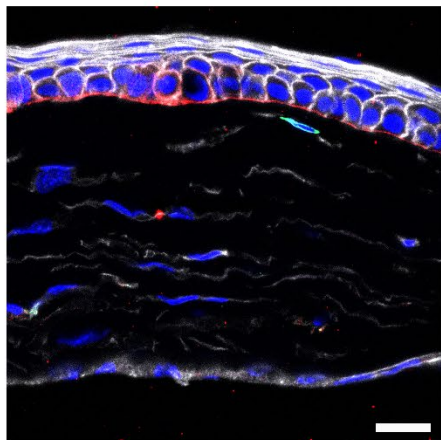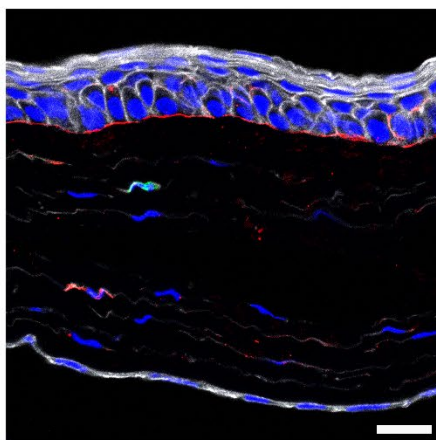

## Supplemental Figure S4.

The frequency of immune cells in the corneal stroma significantly reduces by day 7 post debridement wounding. Day 7 sections were co-labeled with  $\beta 2$  integrin (green) and phalloidin (white) to visualize reepithelialization and cellular components in the corneal stroma beneath the EpBM that consists of  $\alpha 6$  integrin (red). Nuclei were counterstained blue with DAPI. Shown are representative 7.5  $\mu$ m projection images of the peripheral cornea (left column) and central cornea (right column) from four wounded corneas. Mag bars: 20  $\mu$ m.
